# Supplementary material
Source: Springer Nature journal article supplement (https://www.springermedizin.de/resource/supplementary/12884_2014_1176_MOESM1_ESM.pdf/9459100)
Supplement: MOESM1 [file 9459100]

52,806 births during the study period

*Excluded:*

455 multiple pregnancies

12,036 induced deliveries, or caesarean section (elective or intrapartum), or unknown type of delivery

8,769 first antenatal visit after 12 weeks or unknown

*Other missing or incorrect data:*

922 gestational age (<22, ≥45, or missing)

261 BMI ( $\geq 90 \text{ kg/m}^2$ , or missing)

41 maternal age (missing)

19 residence (missing)

42 marital status (missing)

492 smoking status (missing)

12 alcohol consumption (missing)

22 parity (missing)

26 infant sex (undetermined or missing)

29,709 births were used in the analysis
